# Supplementary material
Source: PubMed Central journal article supplement (PMC3281682)
Supplement: supp_M111.277061_Supplemental_Data_File_for_277061-_replacement.pdf [file supp_M111.277061_Supplemental_Data_File_for_277061-_replacement.pdf]

Supplemental Data

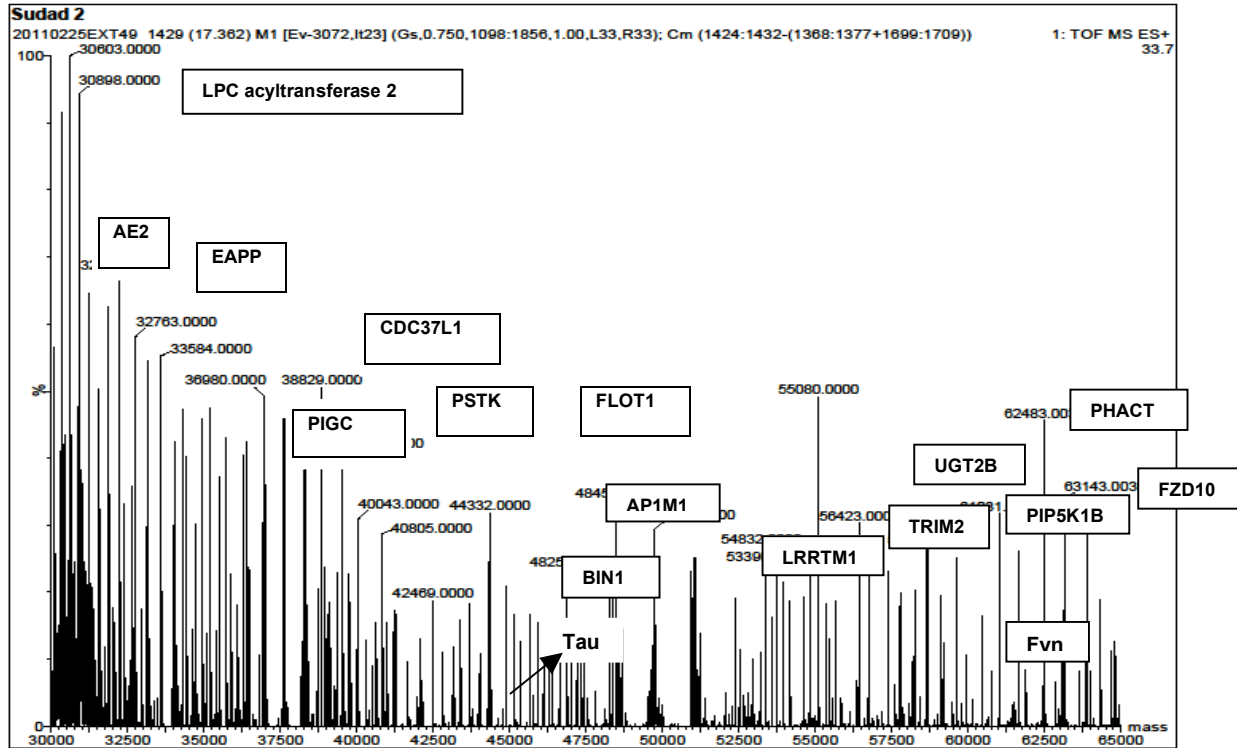

**Supplemental Figure 1** Sample run from mass spectrometric analyses of exosomal fractions from MIC media performed in this study, showing a small subset of the identified proteins that copurified with tau (arrow) in exosomal fractions as described (see Figures 1-2). Some labels are omitted due to space considerations. A complete list of proteins identified so far is given below. Identification of proteins was based on mass measurement obtained on MS/MS: The masses were matched against calculated masses derived from the ExPASy digestion of protein databases using the Mascot peptide fragment identification program, which identifies database entries that have the largest number of matches. Identifications via this method have a 95% chance or greater of being correct.

|     |                                                                                        |     |                                                                                  |
|-----|----------------------------------------------------------------------------------------|-----|----------------------------------------------------------------------------------|
| 1.  | Activin receptor type-1B                                                               | 31. | Microtubule-associated protein tau                                               |
| 2.  | Alix (PDCD61P)                                                                         | 32. | Mitochondrial Rho GTPase 1                                                       |
|     | Ankyrin repeat and sterile alpha motif domain-containing protein 1B                    | 33. | Mitochondrial tRNA-specific 2-thiouridylase 1                                    |
| 3.  | Annexin A7                                                                             | 34. | Mitogen-activated protein kinase kinase kinase 3                                 |
| 4.  | Arf-GAP with coiled-coil, ANK repeat and PH domain-containing protein 3                | 35. | NADPH oxidase 1                                                                  |
| 5.  | Arylsulfatase A                                                                        | 36. | Nucleoporin SEH1                                                                 |
| 6.  | Beta-1,3-galactosyl-O-glycosyl-glycoprotein beta-1,6-N-acetylglucosaminyltransferase 6 | 37. | Peripherin                                                                       |
| 7.  | Beta-arrestin-2                                                                        | 38. | Peroxisomal 3,2-trans-enoyl-CoA isomerase                                        |
| 8.  | CaM kinase-like vesicle-associated protein                                             | 39. | Protein CASP                                                                     |
| 9.  | CAP-Gly domain-containing linker protein 4                                             | 40. | Protein phosphatase 1 regulatory subunit 12C                                     |
| 10. | CDP-diacylglycerol-glycerol-3-phosphate 3 phosphatidyltransferase, mitochondrial       | 41. | Protein phosphatase 1J                                                           |
| 11. | Collagen alpha-1(XXV) chain                                                            | 42. | Proto-oncogene DBL                                                               |
| 12. | Cytochrome c oxidase assembly protein COX15 homolog                                    | 43. | Rab GTPase-activating protein 1-like                                             |
| 13. | Cytoskeleton-associated protein 2-like                                                 | 44. | Rab11 family-interacting protein 5                                               |
| 14. | Duffy antigen/chemokine receptor                                                       | 45. | Rap guanine nucleotide exchange factor-like 1                                    |
| 15. | Dynein 1 intermediate chain 2 cytoplasmic11%                                           | 46. | Rap1 GTPase-activating protein 1                                                 |
| 16. | Dynein heavy chain 6, axonemal                                                         | 47. | Rap1 GTPase-activating protein 2                                                 |
| 17. | E3 ubiquitin-protein ligase MGRN1                                                      | 48. | Regulator of G-protein signaling 20                                              |
| 18. | EGF-containing fibulin-like extracellular matrix protein 1                             | 49. | Serine/threonine-protein kinase H2                                               |
| 19. | F-box only protein 11                                                                  | 50. | Serine/threonine-protein kinase PAK 6                                            |
| 20. | Fibrinogen alpha chain                                                                 | 51. | Serine/threonine-protein phosphatase 2A 55 kDa regulatory subunit B beta isoform |
| 21. | Flotillin 1                                                                            | 52. | SH3 domain-containing kinase-binding protein 1                                   |
| 22. | Frizzled-10                                                                            | 53. | Sodium-coupled monocarboxylate transporter 2                                     |
| 23. | Gliomedin                                                                              | 54. | Sterol regulatory element-binding protein 1                                      |
| 24. | Glycylpeptide N-tetradecanoyltransferase 1                                             | 55. | Succinyl-CoA ligase [ADP-forming] subunit beta, mitochondrial                    |
| 25. | Hsc70-interacting protein (CHIP)                                                       | 56. | TBC1 domain Rab family member 14                                                 |
| 26. | Keratin, type II cytoskeletal 3                                                        | 57. | Tetratricopeptide repeat protein 30A                                             |
| 27. | KIF1-binding protein                                                                   | 58. | TGF-beta-activated kinase 1 and MAP3K7-binding protein 2                         |
| 28. | Leucine-rich repeat-containing protein C10orf92                                        | 59. | Tight junction-associated protein 1                                              |
| 29. | Liprin-alpha-4                                                                         | 60. | Tomoregulin-2                                                                    |
| 30. | Mannan-binding lectin serine protease 2                                                | 61. | Tripartite motif-containing protein 2                                            |
|     |                                                                                        | 62. | Tubulin beta-2C chain                                                            |
|     |                                                                                        | 63. | Tubulin gamma-1 chain                                                            |
|     |                                                                                        | 64. | Tyrosine-protein kinase Fyn                                                      |

**Supplemental Table 1** List of proteins identified in exosomal fractions of M1C media (Figure 1) that were enriched in secreted exosomes. Only proteins that were individually identified by Mascot 60% or more of the time by mass spectrometric analysis are shown. All identifications were at a level of at least 95% confidence.
